# Supplementary material for: Alkanolamines as Dual Functional Solvents for Biomass Deconstruction and Bioenergy Production
Source: Royal Society of Chemistry journal article supplement (doi:10.1039/d1gc02667d), 2021-01-01
Supplement: d1gc02667d1.pdf [file d1gc02667d1.pdf]

**SUPPLEMENTARY INFORMATION**

**Alkanolamines as Dual Functional Solvents for Biomass  
Deconstruction and Bioenergy Production**

Ezinne C. Achinivu,<sup>a,b</sup> Skye Frank,<sup>a,c</sup> Nawa Raj Baral,<sup>a,c</sup> Lalitendu Das,<sup>a</sup> Mood Mohan,<sup>a</sup> Peter Otoupal,<sup>a,b</sup> Emara Shabir,<sup>a,b</sup> Sean Utan,<sup>a,b</sup> Corinne D. Scown,<sup>a,c</sup> Blake A. Simmons,<sup>a,c</sup> John Gladden\*<sup>a,b</sup>

<sup>a</sup>Joint BioEnergy Institute, Lawrence Berkeley National Laboratory, 5885 Hollis St, Emeryville, CA 94608, USA.

<sup>b</sup>Sandia National Laboratories, 7011 East Ave, Livermore, CA 94551, USA.

<sup>c</sup>Biological Systems and Engineering Division, Lawrence Berkeley National Laboratory, Berkeley, CA 94720, USA.

\*Corresponding Author

E-mail: [jmgladden@lbl.gov](mailto:jmgladden@lbl.gov); [jmgladd@sandia.gov](mailto:jmgladd@sandia.gov) (J. M. Gladden)

|                                                                                       |           |
|---------------------------------------------------------------------------------------|-----------|
| <b>PRELIMINARY SCREENING</b>                                                          | <b>3</b>  |
| <b>Survey of Different Alkanolamines for Biomass Pretreatment</b>                     | <b>3</b>  |
| <b>Pretreatment Effectiveness for Different Biomass Types</b>                         | <b>6</b>  |
| <b>PROCESS DEVELOPMENT</b>                                                            | <b>7</b>  |
| <b>Process Optimization using Design of Experiment (DOE) and Statistical Analyses</b> | <b>7</b>  |
| <b>Scale Up/Process Consolidation</b>                                                 | <b>6</b>  |
| <b>BIOMASS CHEMICAL AND STRUCTURAL CHARACTERIZATION</b>                               | <b>8</b>  |
| <b>PXRD</b>                                                                           | <b>8</b>  |
| TGA                                                                                   | 10        |
| FTIR                                                                                  | 12        |
| NMR                                                                                   | 14        |
| <b>BIOCONVERSION</b>                                                                  | <b>16</b> |

## PRELIMINARY SCREENING

### Survey of Different Alkanolamines for Biomass Pretreatment

**Table S1. List of the alkanolamines studied and a comparison of their constituents, functional groups, and degree of substitution.**

| Alkanolamine              | #O-H | #N-H   | #H-bonds |
|---------------------------|------|--------|----------|
| ethanolamine              | 1    | 1 (1°) | 3        |
| 1-amino-2-propanol        | 1    | 1 (1°) | 3        |
| 2-(Methylamino)ethanol    | 1    | 1 (2°) | 2        |
| N, N-dimethylethanolamine | 1    | 1 (3°) | 1        |
| 1,3-diamino-2-propanol    | 2    | 1 (1°) | 4        |
| 2-amino-1,3-propanediol   | 1    | 2 (1°) | 5        |

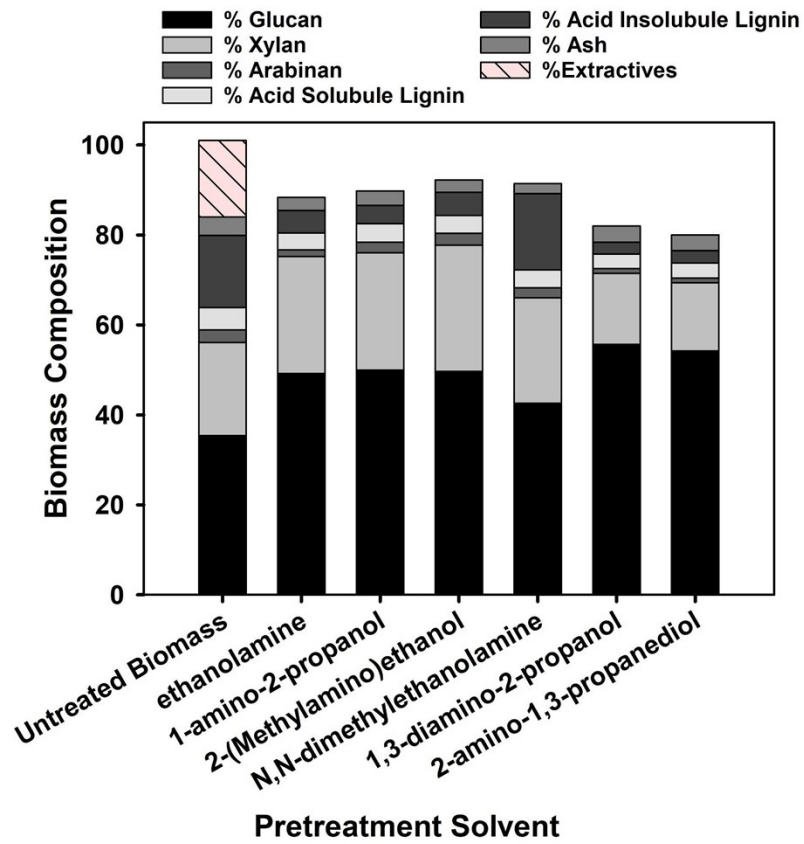

**Figure S1.** Biomass yield and composition after pretreatment of sorghum with the organic solvents. The composition of the untreated “raw biomass” is also displayed.

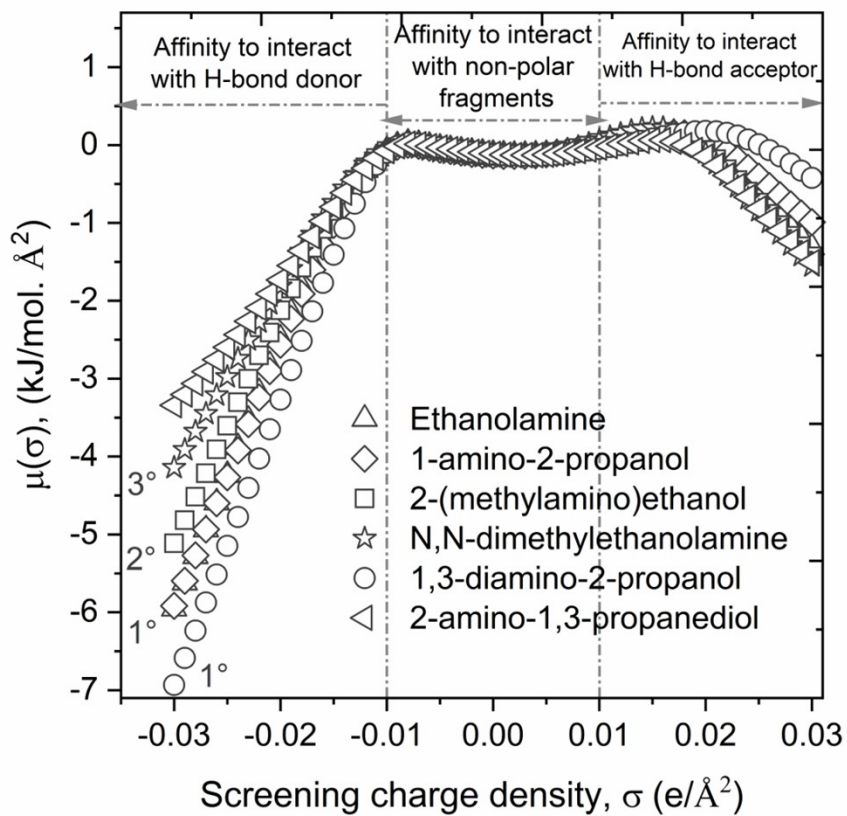

**Figure S2.** COSMO-RS-based predicted sigma potentials for the alkanolamines.

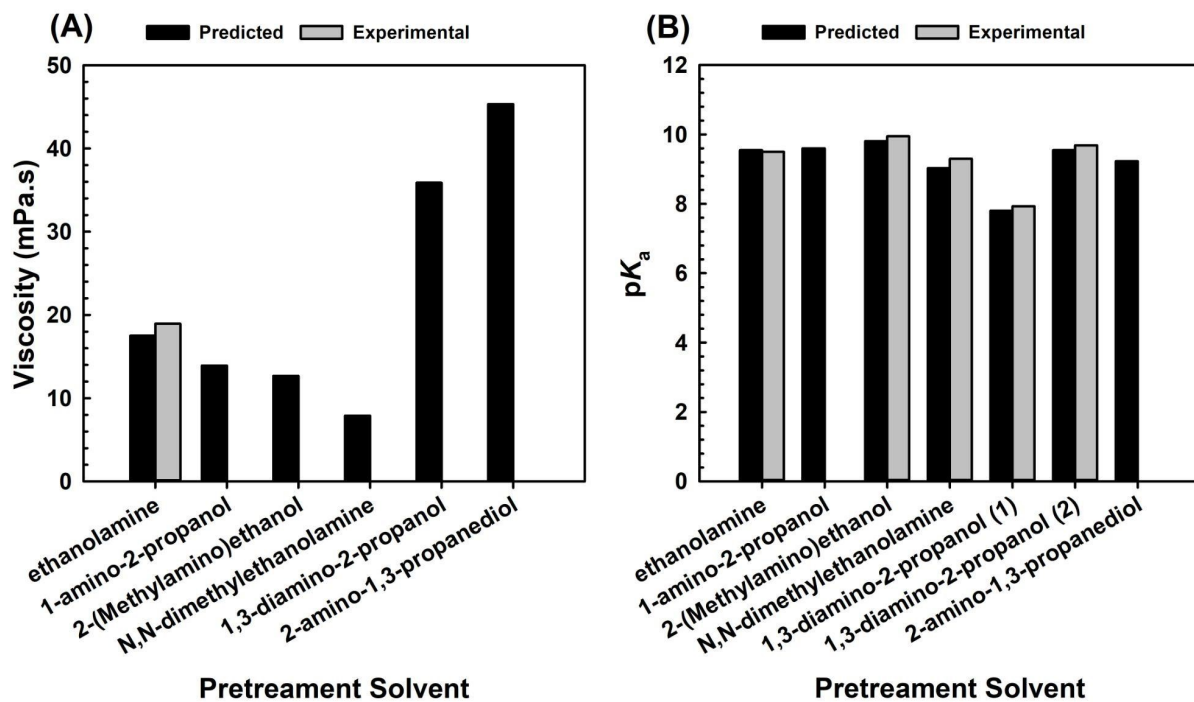

Figure S3. Predicted excess viscosities (A) and pKa values (B) for the alkanolamines screened.

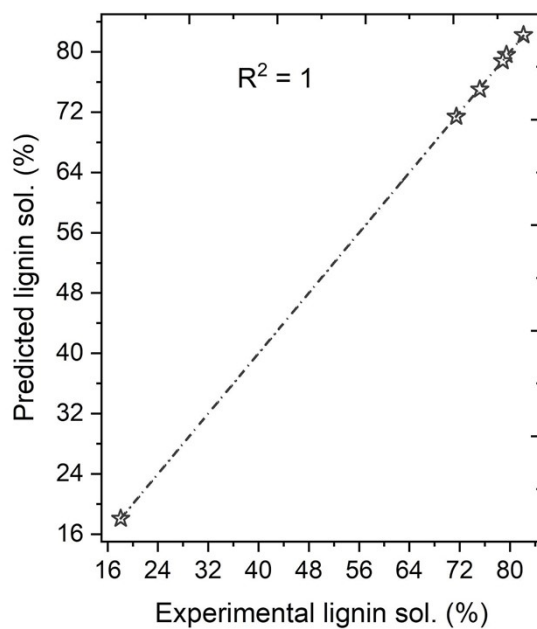

Figure S4. Experimental and COSMO-RS-based predicted lignin solubility for alkanolamines.

## Pretreatment Effectiveness for Different Biomass Types

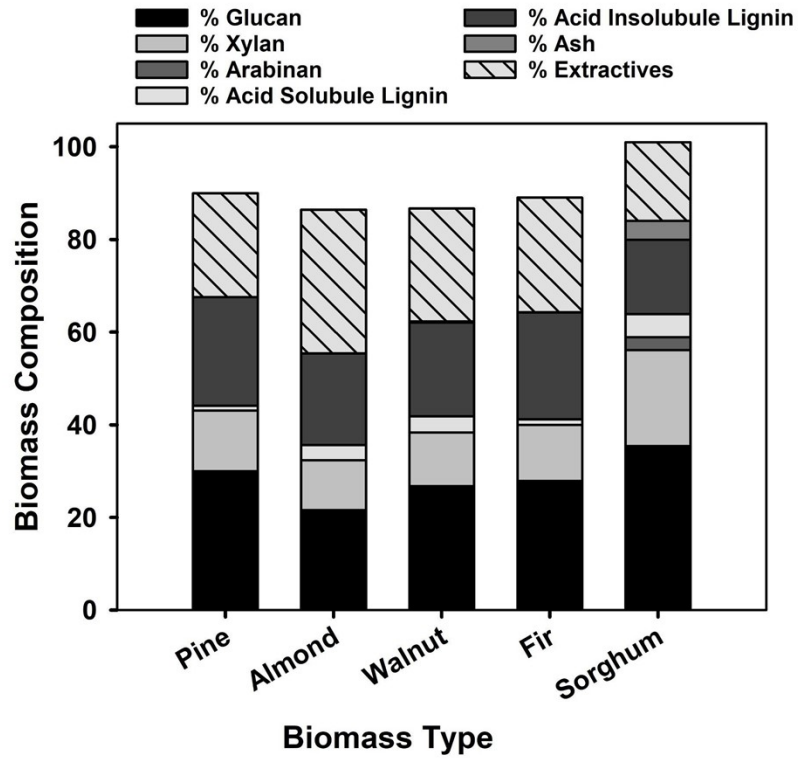

**Figure S5.** Biomass compositional analysis for various raw biomass types after pretreatment (and washing).

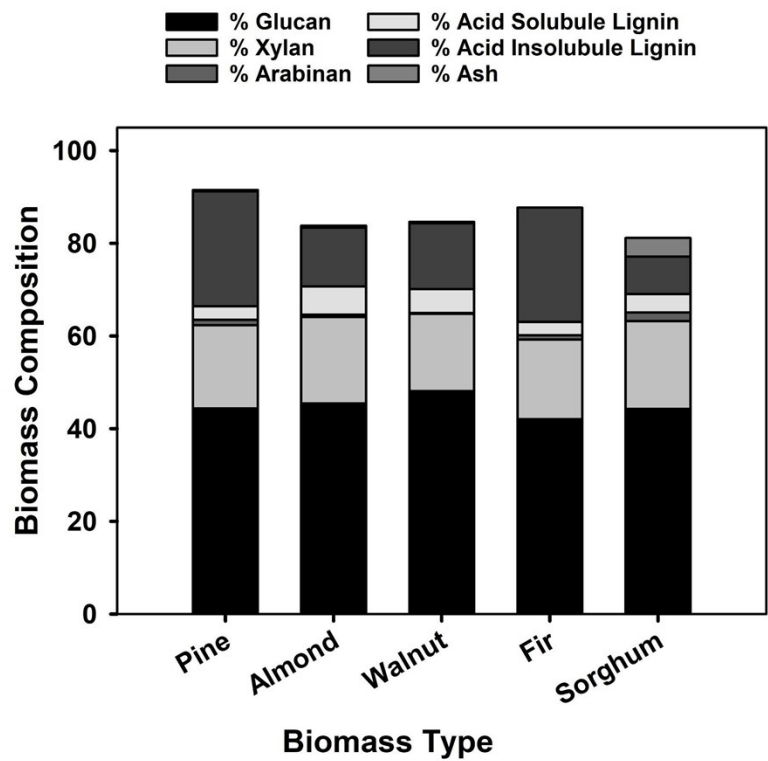

**Figure S6.** Biomass compositional analysis for various biomass types after pretreatment (and washing) for raw biomass.



## PROCESS DEVELOPMENT

### Process Optimization using Design of Experiment (DOE) and Statistical Analyses

The quadratic regression models for the glucose yield, xylose yield, lignin retained, and solid recovery were shown below:

$$\begin{aligned} \hat{Y}_{glucose} &= 87.70 + 0.14 \times time - 0.59 \times temperature + 0.42 \times solid\ loading - 1.55 \times time * time - 3.33 \\ &* temperature - 0.05 \times solid\ loading * solid\ loading - 2.77 \times temperature * time - 0.91 \\ &\times solid\ loading * time - 0.17 \times solid\ loading \\ &* temperature \end{aligned} \quad (Eq.2)$$

$$\begin{aligned} \hat{Y}_{xylose} &= 69.46 - 1.30 \times time - 0.85 \times temperature + 4.79 \times solid\ loading - 0.27 \times time * time - 2.25 \\ &* temperature + 0.13 \times solid\ loading * solid\ loading - 1.98 \times temperature * time - 0.21 \\ &\times solid\ loading * time + 0.27 \times solid\ loading \\ &* temperature \end{aligned} \quad (Eq.3)$$

$$\begin{aligned} \hat{Y}_{lignin\ removed} &= 72.55 + 3.29 \times time + 5.92 \times temperature - 3.10 \times solid\ loading - 1.07 \times time * time + 0.58 \\ &\times temperature * temperature - 0.11 \times solid\ loading * solid\ loading - 1.99 \times temperature \\ &* time + 0.29 \times solid\ loading * time + 0.48 \times solid\ loading \\ &* temperature \end{aligned} \quad (Eq.4)$$

$$\begin{aligned} \hat{Y}_{solid\ recovered} &= 64.45 - 1.99 \times time - 4.59 \times temperature + 1.30 \times solid\ loading - 0.11 \times time * time - 1.95 \\ &\times temperature * temperature - 0.54 \times solid\ loading * solid\ loading - 0.26 \times temperature \\ &* time + 0.23 \times solid\ loading * time - 0.87 \times solid\ loading \\ &* temperature \end{aligned} \quad (Eq.5)$$

where,  $X_1$ ,  $X_2$ , and  $X_3$  are time, temperature, and solid loading, respectively. The coefficients with one factor ( $X_1$ ,  $X_2$ ,  $X_3$ ) represent the linear effects, while the coefficients with second order term ( $X_1^2$ ,  $X_2^2$ ,  $X_3^2$ ) and two-factor term ( $X_1X_2$ ,  $X_1X_3$ ,  $X_2X_3$ ) represent the quadratic effect and interaction effects, respectively.

**Table S2. Experimental conditions and corresponding observed and predicted yields from sorghum biomass using ethanolamine.**

| Experiment # | Pattern | Time (h) | Temperature (°C) | Solid loading (%) | Glucose Yield (%) | Xylose Yield (%) | Lignin removed (%) | Solid Recovery (%) | Predicted Glucose Yield (%) | Predicted Xylose Yield (%) | Predicted Lignin removed (%) | Predicted Solid Recovery (%) |
|--------------|---------|----------|------------------|-------------------|-------------------|------------------|--------------------|--------------------|-----------------------------|----------------------------|------------------------------|------------------------------|
| 1            | —+      | 1        | 100              | 40                | 87.1±3.2          | 75.9±2.0         | 59.3±1.4           | 72.5±0.3           | 82.0                        | 72.0                       | 56.9                         | 70.1                         |
| 2            | 00a     | 2        | 120              | 13.2              | 87.0±1.8          | 62.7±2.3         | 79.8±1.8           | 60.6±1.0           | 86.9                        | 61.8                       | 77.5                         | 60.7                         |
| 3            | 000     | 2        | 120              | 30                | 90.0±3.1          | 70.5±3.0         | 73.0±4.5           | 64.4±1.0           | 87.7                        | 69.5                       | 72.5                         | 64.5                         |
| 4            | 000     | 2        | 120              | 30                | 86.2±3.0          | 69.0±3.0         | 72.6±1.2           | 64.7±2.1           | 87.7                        | 69.5                       | 72.5                         | 64.5                         |
| 5            | a00     | 0.3      | 120              | 30                | 78.4±3.1          | 67.3±2.4         | 59.6±5.2           | 66.9±2.3           | 83.1                        | 70.9                       | 64.0                         | 67.5                         |
| 6            | +++     | 3        | 100              | 40                | 90.5±5.6          | 76.6±5.1         | 69.5±2.0           | 68.4±1.3           | 85.9                        | 72.9                       | 68.0                         | 67.1                         |
| 7            | —+      | 1        | 140              | 20                | 82.4±2.2          | 63.1±1.8         | 80.2±0.7           | 58.8±0.4           | 83.6                        | 64.2                       | 79.5                         | 59.3                         |
| 8            | 0A0     | 2        | 154              | 30                | 80.0±1.3          | 63.2±0.8         | 80.8±3.9           | 53.9±0.0           | 77.3                        | 61.7                       | 84.1                         | 51.2                         |
| 9            | 00A     | 2        | 120              | 46.8              | 83.4±1.0          | 73.4±1.3         | 61.6±9.8           | 64.2±0.5           | 88.3                        | 77.9                       | 67.0                         | 65.1                         |

|    |     |     |     |    |          |          |          |          |      |      |      |      |
|----|-----|-----|-----|----|----------|----------|----------|----------|------|------|------|------|
| 10 | A00 | 3.7 | 120 | 30 | 83.5±0.6 | 66.5±1.0 | 76.4±3.8 | 60.3±0.0 | 83.5 | 66.5 | 75.1 | 60.8 |
| 11 | ++- | 3   | 140 | 20 | 78.3±1.5 | 56.7±0.4 | 81.3±2.1 | 52.7±0.1 | 80.2 | 58.1 | 81.5 | 54.3 |
| 12 | -++ | 1   | 140 | 40 | 88.1±9.4 | 77.1±9.5 | 78.2±1.0 | 58.4±1.9 | 86.0 | 74.7 | 73.7 | 59.7 |
| 13 | +-- | 3   | 100 | 20 | 87.7±5.0 | 64.5±3.7 | 71.4±1.5 | 64.3±2.4 | 86.6 | 64.3 | 74.6 | 62.3 |
| 14 | --- | 1   | 100 | 20 | 83.3±1.2 | 65.4±0.1 | 65.2±2.8 | 67.3±0.9 | 79.0 | 62.5 | 64.6 | 66.2 |
| 15 | 0a0 | 2   | 86  | 30 | 71.8±1.5 | 59.4±1.3 | 64.5±2.2 | 63.0±0.1 | 79.3 | 64.5 | 64.2 | 66.7 |
| 16 | +++ | 3   | 140 | 40 | 77.8±1.9 | 67.5±1.8 | 78.4±1.6 | 55.4±0.0 | 78.9 | 67.8 | 76.8 | 55.7 |

**Table S3. ANOVA and lack-of-fit test for Glucose yield. Asterisks (\*) indicate statistical significance.**

| Source                      | DF | Sum of Squares  | Mean Square      | F Ratio        | Prob > F             | R <sup>2</sup> |
|-----------------------------|----|-----------------|------------------|----------------|----------------------|----------------|
| Model                       | 9  | 607.4306        | 67.4923          | 2.5867         | 0.0197*              | 0.68           |
| Error                       | 38 | 991.4975        | 26.0920          |                |                      |                |
| C. Total                    | 47 | 1598.9280       |                  |                |                      |                |
| Lack of Fit                 | 5  | 562.04229       | 112.408          | 8.6376         | <.0001*              |                |
| Pure Error                  | 33 | 429.45516       | 13.014           |                |                      |                |
| Total Error                 | 38 | 991.49745       |                  |                |                      |                |
| <b>Parameter Estimates</b>  |    |                 |                  |                |                      |                |
| <b>Term</b>                 |    | <b>Estimate</b> | <b>Std Error</b> | <b>t Ratio</b> | <b>Prob &gt;  t </b> |                |
| Intercept                   |    | 87.699439       | 2.079236         | 42.18          | <.0001*              |                |
| Time (1,3)                  |    | 0.138268        | 0.798028         | 0.17           | 0.8634               |                |
| Temperature (100,140)       |    | -0.594844       | 0.798028         | -0.75          | 0.4606               |                |
| Solid loading (20,40)       |    | 0.417333        | 0.798028         | 0.52           | 0.6040               |                |
| Time*Temperature            |    | -2.765146       | 1.042674         | -2.65          | 0.0116*              |                |
| Time*Solid loading          |    | -0.906962       | 1.042674         | -0.87          | 0.3898               |                |
| Temperature * Solid loading |    | -0.171496       | 1.042674         | -0.16          | 0.8702               |                |
| Time*Time                   |    | -1.55105        | 0.968927         | -1.60          | 0.1177               |                |
| Temperature * Temperature   |    | -3.329494       | 0.968927         | -3.44          | 0.0014*              |                |

|                               |           |          |       |        |
|-------------------------------|-----------|----------|-------|--------|
| Solid loading * Solid loading | -0.049444 | 0.968927 | -0.05 | 0.9596 |
|-------------------------------|-----------|----------|-------|--------|

**Table S4. ANOVA and lack-of-fit test for Xylose yield. Asterisks (\*) indicate statistical significance.**

| Source                      | DF | Sum of Squares | Mean Square | F Ratio | Prob > F  | R <sup>2</sup> |
|-----------------------------|----|----------------|-------------|---------|-----------|----------------|
| Model                       | 9  | 1321.3897      | 146.821     | 8.1883  | <.0001*   | 0.66           |
| Error                       | 38 | 681.3611       | 17.931      |         |           |                |
| C. Total                    | 47 | 2002.7508      |             |         |           |                |
| Lack of Fit                 | 5  | 327.94620      | 65.5892     | 6.1244  | 0.0004    |                |
| Pure Error                  | 33 | 353.41493      | 10.7095     |         |           |                |
| Total Error                 | 38 | 681.36114      |             |         |           |                |
| <b>Parameter Estimates</b>  |    |                |             |         |           |                |
| Term                        |    | Estimate       | Std Error   | t Ratio | Prob >  t |                |
| Intercept                   |    | 69.458431      | 1.72364     | 40.30   | <.0001*   |                |
| Time (1,3)                  |    | -1.295873      | 0.661547    | -1.96   | 0.0575    |                |
| Temperature (100,140)       |    | -0.853914      | 0.661547    | -1.29   | 0.2046    |                |
| Solid loading (20,40)       |    | 4.7944521      | 0.661547    | 7.25    | <.0001*   |                |
| Time*Temperature            |    | -1.975804      | 0.864353    | -2.29   | 0.0279*   |                |
| Time*Solid loading          |    | -0.205596      | 0.864353    | -0.24   | 0.8133    |                |
| Temperature * Solid loading |    | 0.2651542      | 0.864353    | 0.31    | 0.7607    |                |
| Time*Time                   |    | -0.274729      | 0.803219    | -0.34   | 0.7342    |                |

|                               |           |          |       |         |
|-------------------------------|-----------|----------|-------|---------|
| Temperature * Temperature     | -2.24936  | 0.803219 | -2.80 | 0.0080* |
| Solid loading * Solid loading | 0.1318986 | 0.803219 | 0.16  | 0.8704  |

**Table S5. ANOVA and lack-of-fit test for Lignin removed. Asterisks (\*) indicate statistical significance.**

| Source                      | DF        | Sum of Squares | Mean Square | F Ratio   | Prob > F | R <sup>2</sup> |
|-----------------------------|-----------|----------------|-------------|-----------|----------|----------------|
| Model                       | 9         | 2445.2926      | 271.699     | 13.4855   | <.0001*  | 0.76           |
| Error                       | 38        | 765.6084       | 20.148      |           |          |                |
| C. Total                    | 47        | 3210.9010      |             |           |          |                |
| Lack of Fit                 | 5         | 350.87726      | 70.1755     | 5.5839    | 0.0008*  |                |
| Pure Error                  | 33        | 414.73109      | 12.5676     |           |          |                |
| Total Error                 | 38        | 765.60836      |             |           |          |                |
| <b>Parameter Estimates</b>  |           |                |             |           |          |                |
| Term                        | Estimate  | Std Error      | t Ratio     | Prob >  t |          |                |
| Intercept                   | 72.5468   | 1.827095       | 39.71       | <.0001*   |          |                |
| Time (1,3)                  | 3.2905685 | 0.701254       | 4.69        | <.0001*   |          |                |
| Temperature (100,140)       | 5.9221818 | 0.701254       | 8.45        | <.0001*   |          |                |
| Solid loading (20,40)       | -3.103305 | 0.701254       | -4.43       | <.0001*   |          |                |
| Time*Temperature            | -1.990408 | 0.916233       | -2.17       | 0.0361*   |          |                |
| Time*Solid loading          | 0.2916083 | 0.916233       | 0.32        | 0.7520    |          |                |
| Temperature * Solid loading | 0.4835583 | 0.916233       | 0.53        | 0.6007    |          |                |

|                               |           |          |       |        |
|-------------------------------|-----------|----------|-------|--------|
| Time*Time                     | -1.069359 | 0.851429 | -1.26 | 0.2168 |
| Temperature * Temperature     | 0.5764851 | 0.851429 | 0.68  | 0.5025 |
| Solid loading * Solid loading | -0.108365 | 0.851429 | -0.13 | 0.8994 |

**Table S6. ANOVA and lack-of-fit test for Solid recovered. Asterisks (\*) indicate statistical significance.**

| Source                        | DF | Sum of Squares | Mean Square | F Ratio | Prob > F  | R <sup>2</sup> |
|-------------------------------|----|----------------|-------------|---------|-----------|----------------|
| Model                         | 9  | 1238.2025      | 137.578     | 31.2974 | <.0001*   | 0.88           |
| Error                         | 38 | 167.0414       | 4.396       |         |           |                |
| C. Total                      | 47 | 1405.2439      |             |         |           |                |
| Lack of Fit                   | 5  | 118.24426      | 23.6489     | 15.9930 | <.0001*   |                |
| Pure Error                    | 33 | 48.79716       | 1.4787      |         |           |                |
| Total Error                   | 38 | 167.04142      |             |         |           |                |
| <b>Parameter Estimates</b>    |    |                |             |         |           |                |
| Term                          |    | Estimate       | Std Error   | t Ratio | Prob >  t |                |
| Intercept                     |    | 64.451849      | 0.853434    | 75.52   | <.0001*   |                |
| Time (1,3)                    |    | -1.998487      | 0.327555    | -6.10   | <.0001*   |                |
| Temperature (100,140)         |    | -4.586121      | 0.327555    | -14.00  | <.0001*   |                |
| Solid loading (20,40)         |    | 1.3012744      | 0.327555    | 3.97    | 0.0003*   |                |
| Time*Temperature              |    | -0.255042      | 0.427971    | -0.60   | 0.5548    |                |
| Time*Solid loading            |    | 0.2297833      | 0.427971    | 0.54    | 0.5945    |                |
| Temperature * Solid loading   |    | -0.868133      | 0.427971    | -2.03   | 0.0496*   |                |
| Time*Time                     |    | -0.114058      | 0.397701    | -0.29   | 0.7758    |                |
| Temperature * Temperature     |    | -1.948541      | 0.397701    | -4.90   | <.0001*   |                |
| Solid loading * Solid loading |    | -0.539306      | 0.397701    | -1.36   | 0.1831    |                |



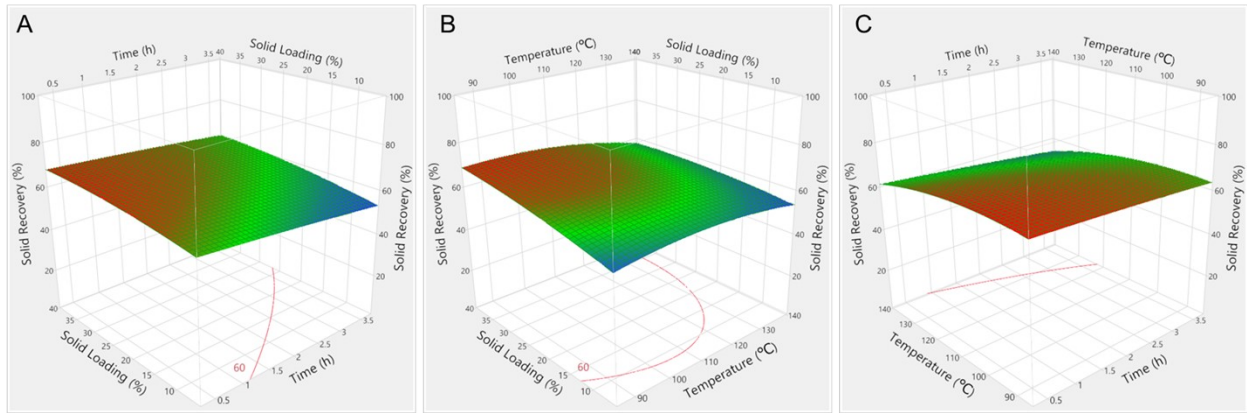

**Figure S7.** Surface response plots for lignin removed showing the effects of A) reaction time and solid loading, B) solid loading and temperature and C) temperature and reaction time.

### Scale Up/Process Consolidation

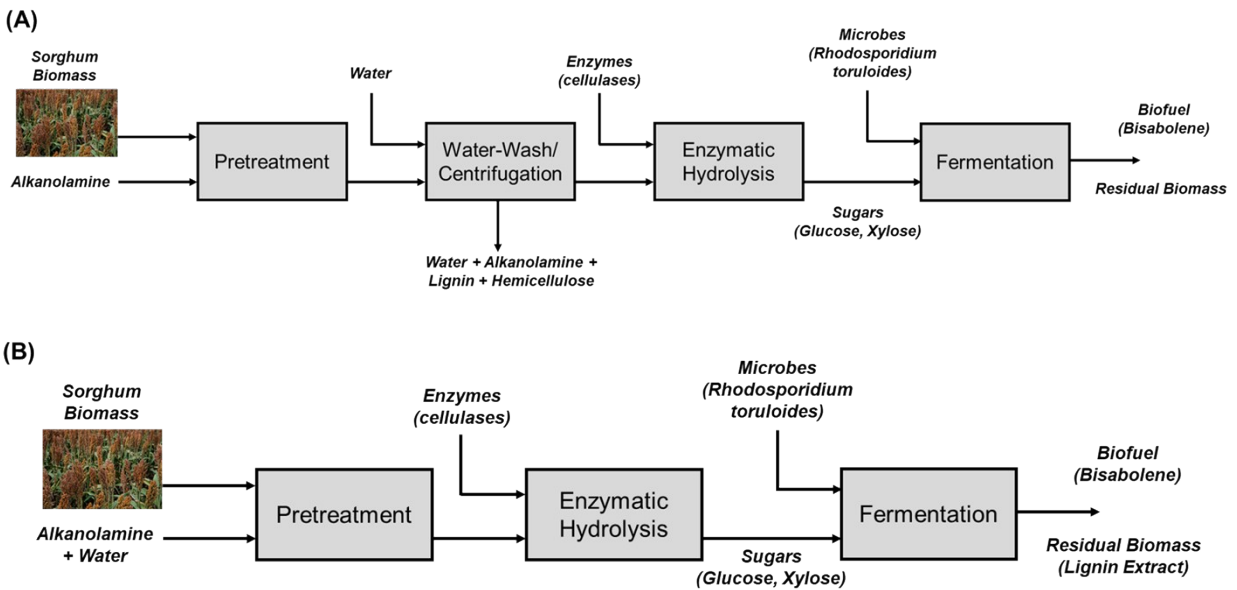

**Figure S8.** Process flow diagram showing a comparison between the water washing technique (A) and one pot technique (B) used in this study.

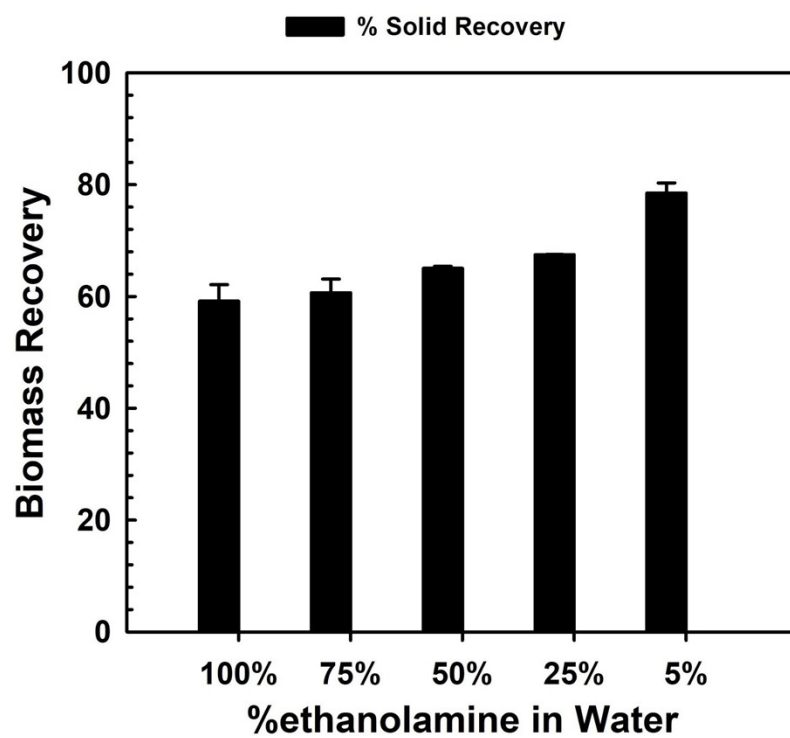

**Figure S9.** Solid recovery after biomass pretreatment with ethanolamine and varying amounts of water.

## BIOMASS CHEMICAL AND STRUCTURAL CHARACTERIZATION

### PXRD

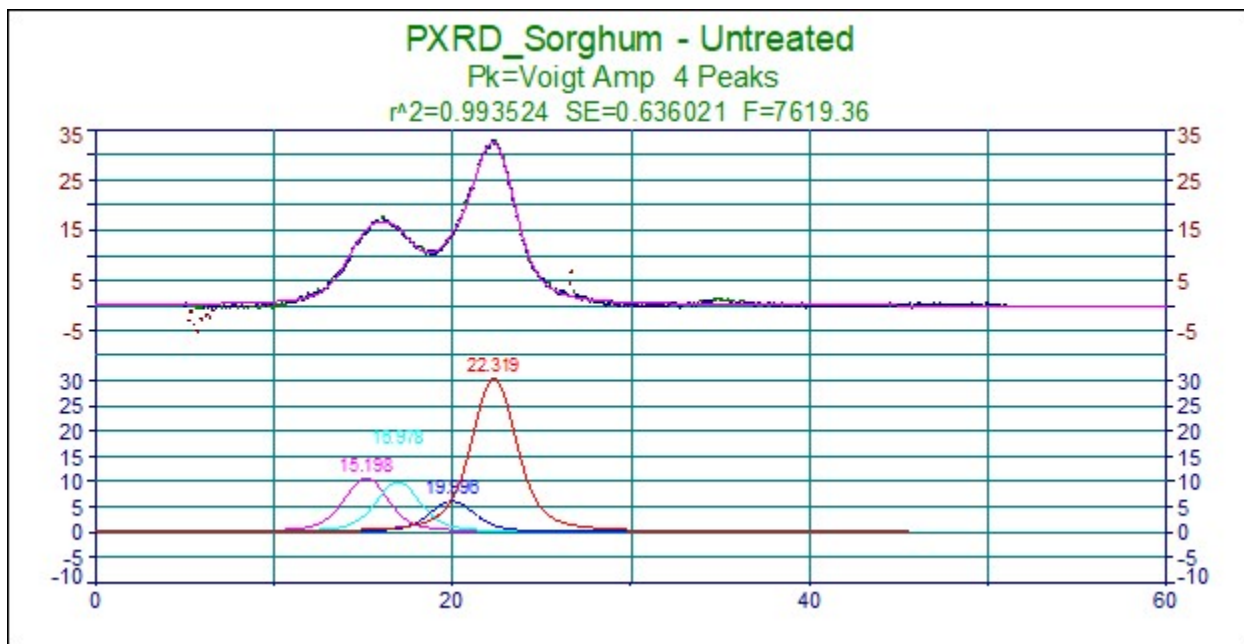

**Figure S10.** X-ray diffraction profiles for untreated sorghum along with results from peak deconvolution.

**Table S7.** X-ray diffraction profiles for untreated sorghum along with results from peak deconvolution and relative areas of each peaks

| Peak | Type  |     | Analytic Area | % Area | Int Area | % Area        | Centro id | mome nt |
|------|-------|-----|---------------|--------|----------|---------------|-----------|---------|
| 1    | Voigt | Amp | 37.6925859    | 13.610 | 36.595   | 13.531        | 15.348    | 10.991  |
|      |       |     |               | 7399   | 587      | 2506          | 1912      | 4303    |
| 2    | Voigt | Amp | 57.618387     | 20.805 | 56.111   | 20.747        | 16.958    | 10.990  |
|      |       |     |               | 9187   | 9713     | 4508          | 3417      | 967     |
| 3    | Voigt | Amp | 28.3427634    | 10.234 | 27.695   | <b>10.240</b> | 19.796    | 10.992  |
|      |       |     |               | 5321   | 3545     | <b>3817</b>   | 8155      | 662     |

|       |            |     |            |        |        |        |        |        |
|-------|------------|-----|------------|--------|--------|--------|--------|--------|
| 4     | Voigt      | Amp | 153.278938 | 55.348 | 150.04 | 55.480 | 22.457 | 10.994 |
|       |            |     |            | 8094   | 9451   | 9169   | 0233   | 724    |
| Total | 276.932674 | 100 | 270.452364 | 100    |        |        |        |        |

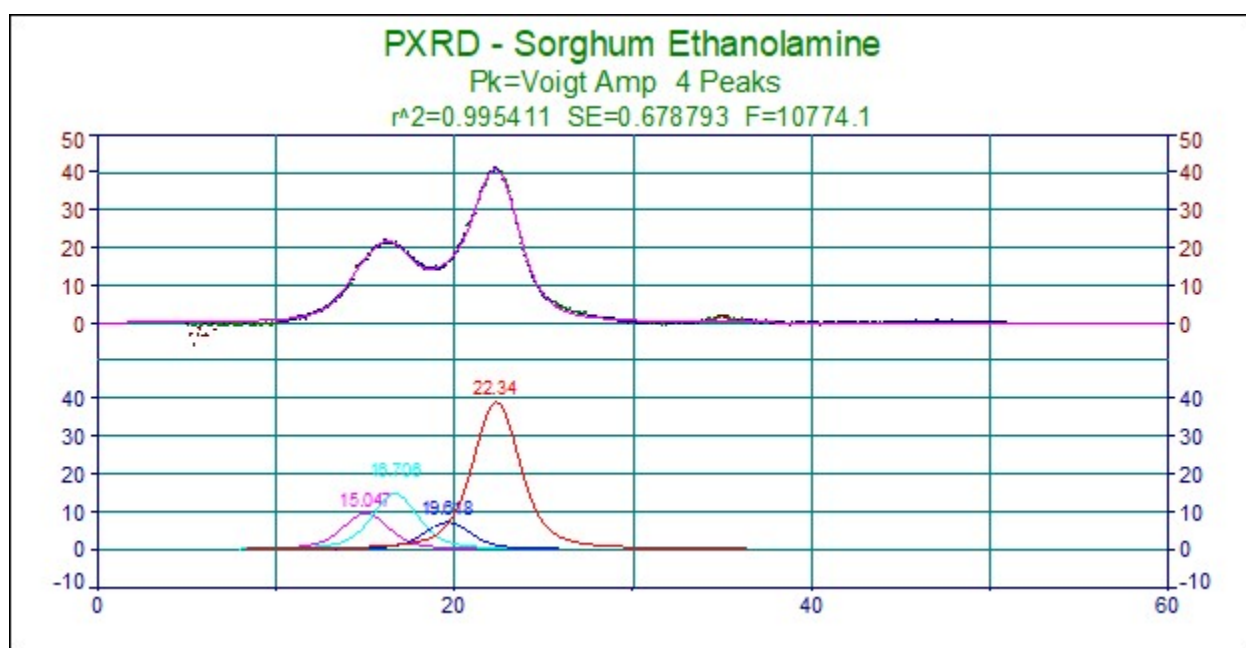

**Figure S11.** X-ray diffraction profiles for ethanolamine-treated sorghum along with results from peak deconvolution.

**Table S8.** X-ray diffraction profiles for ethanolamine-treated sorghum along with results from peak deconvolution and relative areas of each peaks

| Peak | Type  |     | Analytic Area | % Area | Int Area | % Area | Centroid | moment |
|------|-------|-----|---------------|--------|----------|--------|----------|--------|
| 1    | Voigt | Amp | 39.8731       | 18.708 | 38.806   | 18.614 | 15.472   | 10.230 |
|      |       |     | 156           | 854    | 4318     | 6247   | 1664     | 5228   |
| 2    | Voigt | Amp | 36.7806       | 17.257 | 35.900   | 17.220 | 17.205   | 10.230 |

|       |            |     |                |                |                |                              |                |                |
|-------|------------|-----|----------------|----------------|----------------|------------------------------|----------------|----------------|
|       |            |     | 41             | 8348           | 5095           | 7153                         | 5883           | 2058           |
| 3     | Voigt      | Amp | 22.8880<br>028 | 10.739<br>2737 | 22.408<br>6284 | <b>10.748</b><br><b>9452</b> | 20.153<br>1641 | 10.231<br>7764 |
| 4     | Voigt      | Amp | 113.582<br>549 | 53.294<br>0375 | 111.35<br>7243 | 53.415<br>7148               | 22.428<br>6174 | 10.233<br>2549 |
| Total | 213.124308 | 100 | 208.472<br>813 | 100            |                |                              |                |                |

# TGA

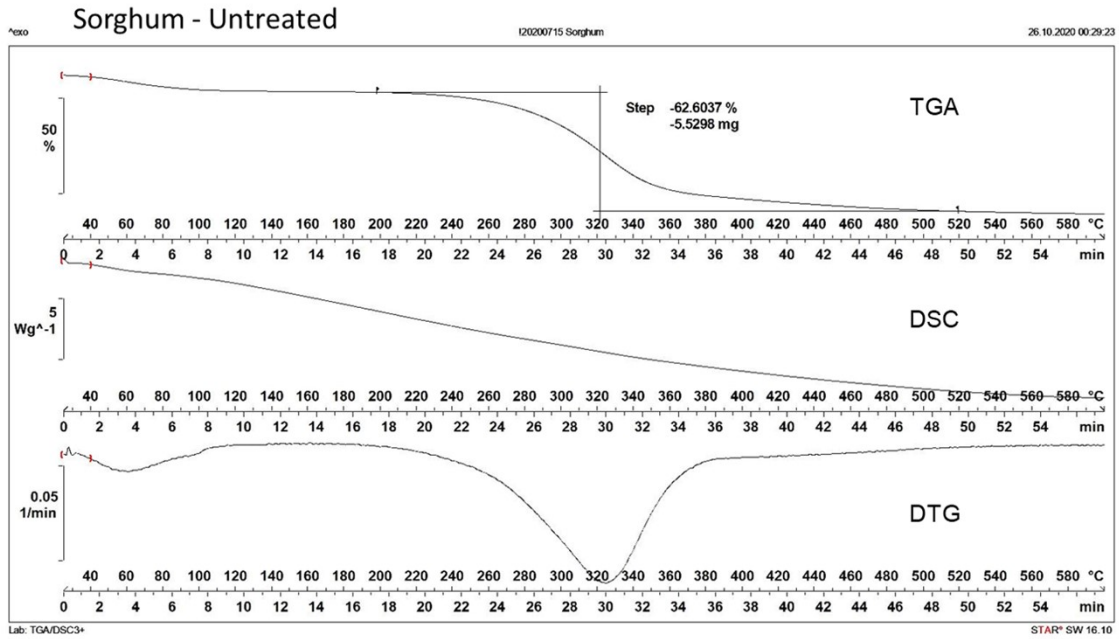

**Figure S12.** TGA for untreated sorghum showing the percent weight change after thermal treatment.

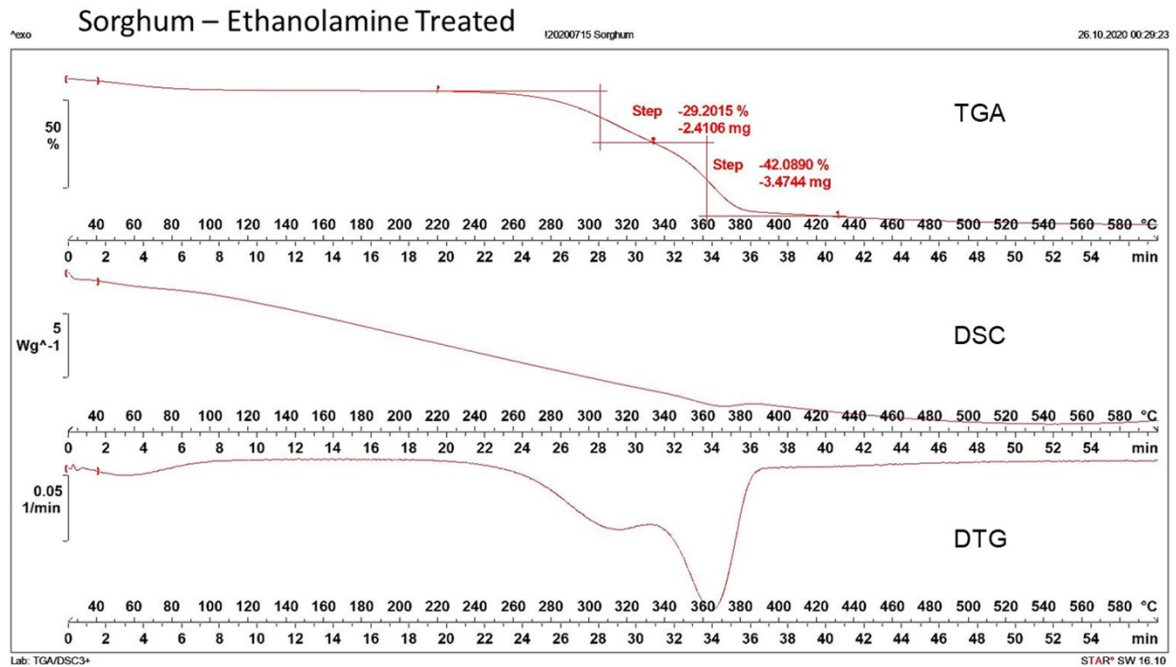

**Figure S13.** TGA for ethanolamine-treated sorghum showing the percent weight change after thermal treatment.

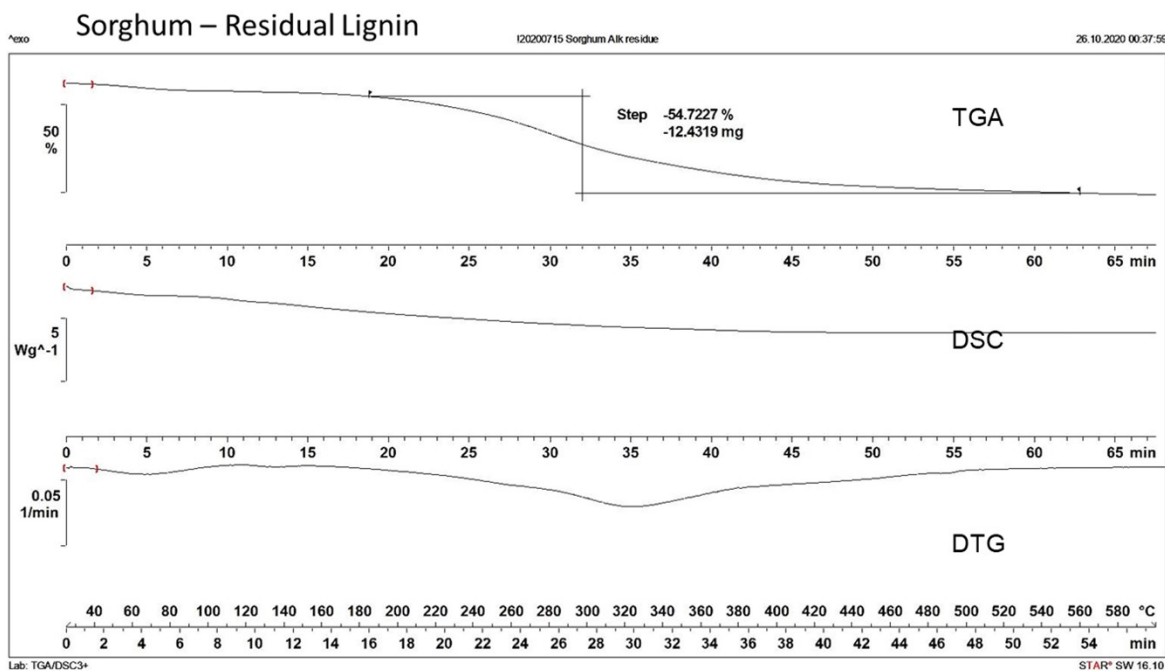

**Figure S14.** TGA for recovered lignin after ethanolamine-treatment of sorghum showing the percent weight change after thermal treatment.

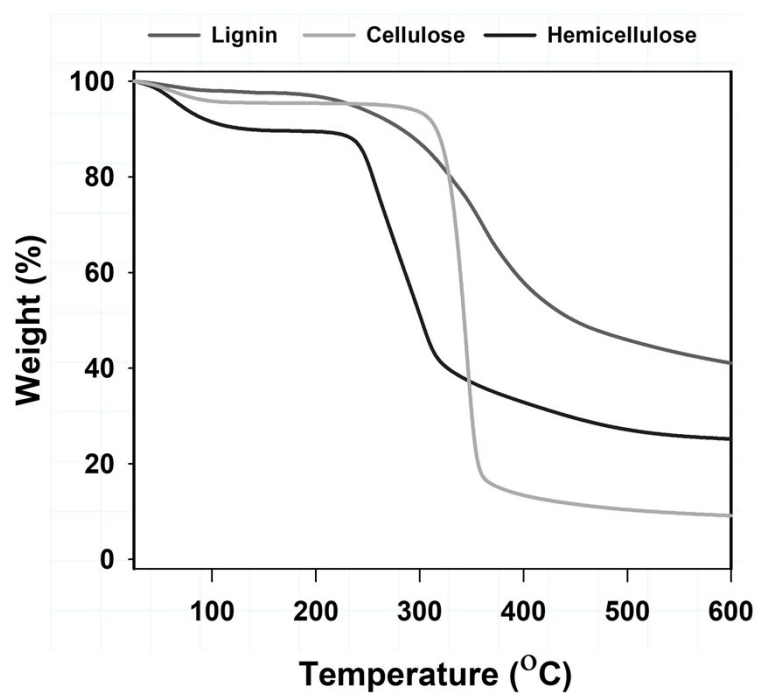

**Figure S15.** Thermal degradation behavior of commercially available biopolymers (xylan - hemicellulose, organosolv lignin, microcrystalline cellulose) using TGA analyses.



## FTIR

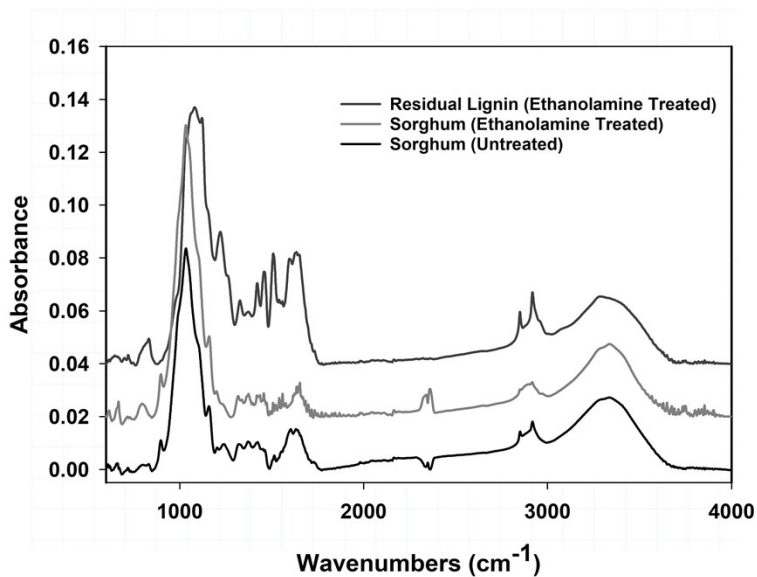

**Figure S16.** Complete FTIR spectra of sorghum before and after ethanolamine-based pretreatment (600–4000 cm<sup>-1</sup>).

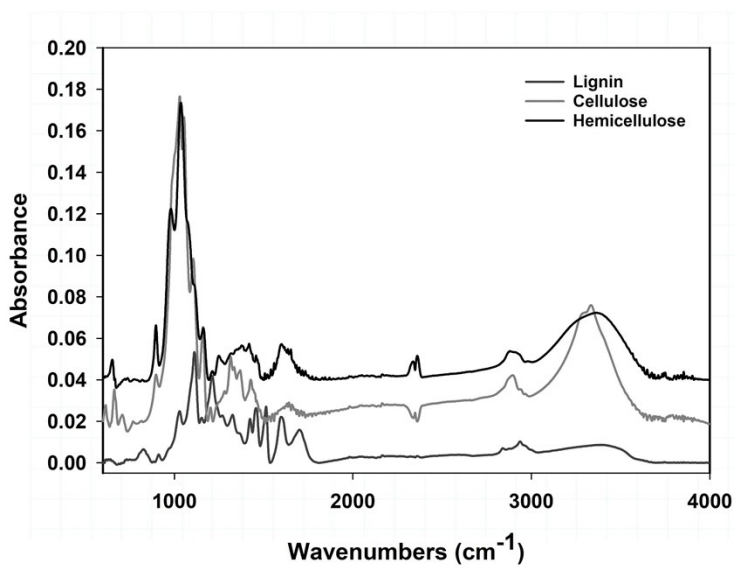

**Figure S17.** Complete FTIR spectra of commercially available biopolymers (xylan - hemicellulose, organosolv lignin, microcrystalline cellulose) (600–4000 cm<sup>-1</sup>).

Table S9. FTIR analysis depicting the peak assignment for key functional groups in sorghum/lignin sorghum before and after ethanolamine-based pretreatment.

| Wavenumber (cm <sup>-1</sup> ) | Assignment                                                                                     |
|--------------------------------|------------------------------------------------------------------------------------------------|
| 1,732                          | Alkyl ester from cell wall hemicellulose C=O; strong carbonyl groups in branched hemicellulose |
| 1,710–1,712                    | C=O in phenyl ester from lignin                                                                |
| 1,638–1,604                    | Doublet phenolics of remained lignin                                                           |
| 1,517–1,516                    | Aromatic C–O stretching mode for lignin; guayacyl ring of lignin                               |
| 1,453–1,456                    | Syringyl absorption of hardwoods (C–H methyl and methylene deformation)                        |
| 1,426–1,429                    | C–H vibrations of cellulose; C–H deformation (asymmetric) of cellulose                         |
| 1,370–1,375                    | C–H stretch of cellulose                                                                       |
| 1,315–1,317                    | C–O vibration of syringyl ring of lignin                                                       |
| 1,242–1,247                    | C–O–H deformation and C–O stretching of phenolics                                              |

## NMR

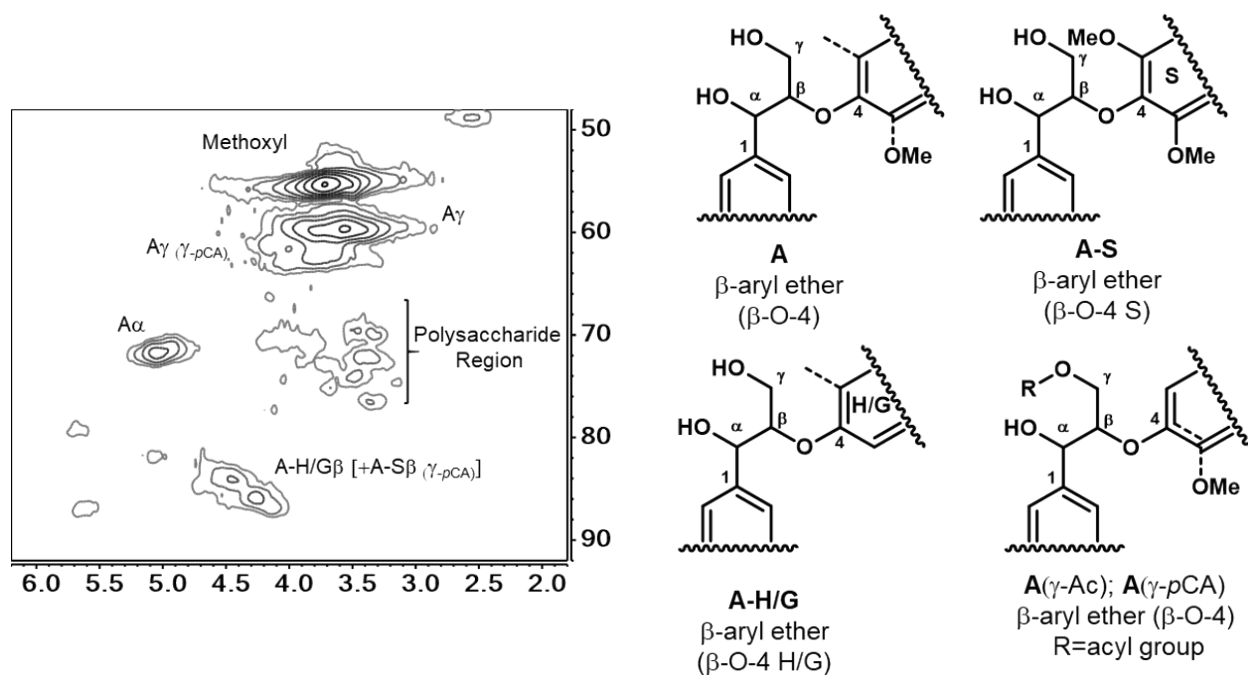

**Figure S18.** Lignin monomeric composition in lignin extract analyzed by 2D  $^{13}\text{C}$ - $^1\text{H}$  HSQC NMR spectroscopy showing the aromatic region ( $\sim 2.5$ – $6.0/50$ – $90$  ppm)). Lignin monomer ratios including tricinn (T) are provided on the figures. S: syringyl, G: guaiacyl, H: p-hydroxyphenyl, pCA: p-coumarate, FA: ferulate.

Table S10. NMR analysis depicting the peak assignment for key functional groups in sorghum/lignin sorghum before and after ethanolamine-based pretreatment.

| f2 (ppm) | f1 (ppm) | Assignment                             |   | % area |
|----------|----------|----------------------------------------|---|--------|
| 8.58     | 147.97   | Pyridine                               |   |        |
| 8.58     | 149.53   | Pyridine                               |   |        |
| 7.72     | 135.47   | C2–H2 and C6–H6 in p-coumarate (PCA)   | H | 1      |
| 7.53     | 137.97   | Pyridine                               |   | 0      |
| 7.46     | 129.21   | C2,6–H2,6 in p-hydroxyphenyl units (H) | H | 2      |

|      |        |                                                  |   |    |
|------|--------|--------------------------------------------------|---|----|
| 7.32 | 123.28 | C2–H2 in ferulate (FA)                           | G | 8  |
| 7.14 | 111.09 | C6–H6 in ferulate (FA)                           | G | 13 |
| 6.92 | 118.9  | C5–H5 and C6–H6 in guaiacyl units (G)            | G | 7  |
| 6.89 | 114.84 | C5–H5 and C6–H6 in guaiacyl units (G)            | G | 24 |
| 6.86 | 114.68 | C5–H5 and C6–H6 in guaiacyl units (G)            | G | 23 |
| 6.85 | 104.06 | C2–H2 and C6–H6 in etherified syringyl units (S) | S | 23 |

|      |       |                                                                                  |
|------|-------|----------------------------------------------------------------------------------|
| 5.01 | 71.71 | C $\alpha$ –H $\alpha$ in $\beta$ -O-4' substructures (A) linked to a S/G-unit   |
| 4.47 | 84.21 | C $\beta$ –H $\beta$ in $\beta$ -O-4' substructures (A) linked to a H-unit       |
| 4.27 | 85.77 | C $\beta$ –H $\beta$ in $\beta$ -O-4' substructures (A) linked to a G unit       |
| 4.18 | 86.55 | C $\beta$ –H $\beta$ in $\beta$ -O-4' substructures linked (A) to a S unit       |
| 4.17 | 61.4  | C $\gamma$ –H $\gamma$ in $\gamma$ -acylated $\beta$ -O-4' substructures (A')    |
| 3.39 | 60.3  | C $\gamma$ –H $\gamma$ in $\gamma$ -hydroxylated $\beta$ -O-4' substructures (A) |

## BIOCONVERSION

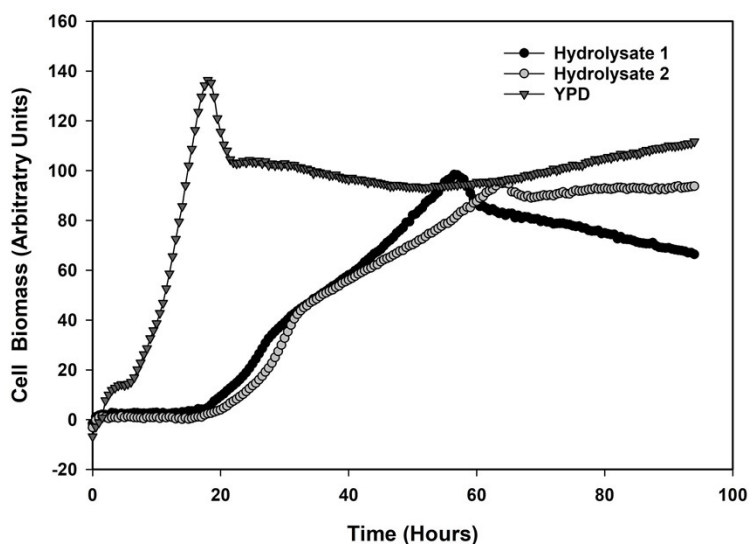

**Figure S19.** Growth curves of *R. toruloides* during fermentation of hydrolysate. Growth was measured using a BioLector microplate system every 30 minutes (arbitrary units). Note that BioLector measurements do not use OD<sub>600</sub>; biomass measurements depend on buoyancy of cells which changes based on media. Error bars represent standard deviation of three technical replicates.

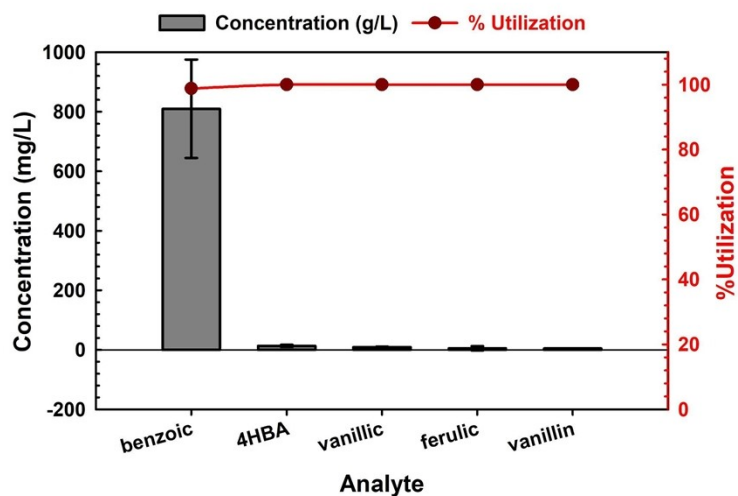

**Figure S20.** Average phenolic composition and utilization of each hydrolysate.

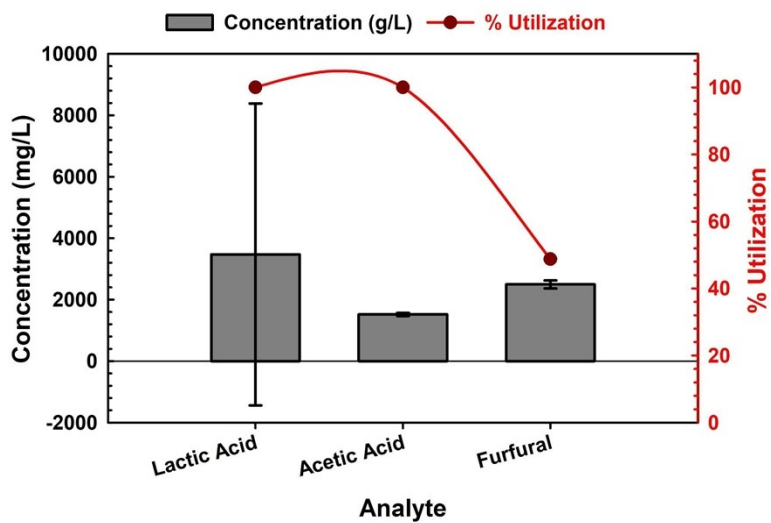

**Figure S21.** Average organic acid and furan composition and utilization of each hydrolysate.

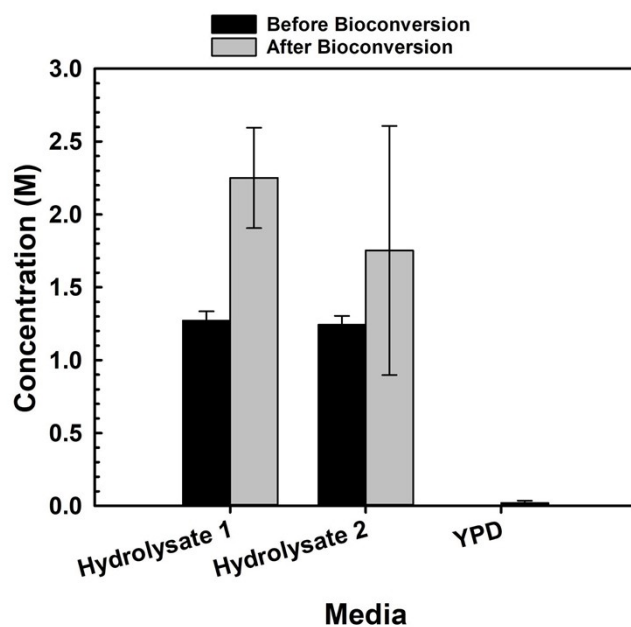

**Figure S22.** Average ethanolamine concentration in each hydrolysate before and after bioconversion.

There is no evidence of *R. toruloides* consuming ethanolamine. The YPD media did not contain ethanolamine. The increase in ethanolamine in the cultures is due to evaporation of water.

## TECHNO ECONOMIC ANALYSIS

Table S11. Major inputs to the techno-economic model developed in this study.

| <b>Parameters</b>                                               | <b>Unit</b>           | <b>Baseline</b> | <b>Optimal</b> |
|-----------------------------------------------------------------|-----------------------|-----------------|----------------|
| Biorefinery size (assumed)                                      | t/day                 | 2000            | 3000           |
| Feedstock cost <sup>1</sup>                                     | \$/t                  | 124.6           | 70.0           |
| GHG emission <sup>1</sup>                                       | kgCO <sub>2</sub> e/t | 137.6           | 122.3          |
| dLUCs <sup>2</sup>                                              | kgCO <sub>2</sub> e/t | -46             | -80            |
| Moisture (assumed)                                              | %                     | 20              | 20             |
| <b>Biomass composition (Fig. 6 and prior study)<sup>3</sup></b> |                       |                 |                |
| Acetate                                                         | wt%                   | 2.2             | 0.9            |
| Ash                                                             | wt%                   | 4.0             | 2.2            |
| Cellulose                                                       | wt%                   | 35.4            | 40.0           |
| Hemicellulose                                                   | wt%                   | 20.7            | 29.8           |
| Lignin                                                          | wt%                   | 21.0            | 9.9            |
| Protein                                                         | wt%                   | 4.4             | 5.2            |
| <b>Pretreatment (This study)</b>                                |                       |                 |                |
| Solid loading rate                                              | wt%                   | 40              | 40             |
| Solvent loading rate                                            | wt%                   | 15              | 10             |
| Solvent cost                                                    | \$/kg                 | 1.45            | 0.80           |
| Pretreatment time                                               | h                     | 1               | 1              |

| <b>Enzymatic hydrolysis (This study)</b> |                   |       |       |
|------------------------------------------|-------------------|-------|-------|
| Enzyme loading rate                      | mg/g-biomass      | 10    | 7     |
| Solid loading for bioconversion          | wt%               | 14    | 25    |
| Cellulose to glucose                     | wt%               | 98.63 | 98.63 |
| Xylan to xylose                          | wt%               | 99.99 | 99.99 |
| Hydrolysis time                          | h                 | 72    | 48    |
| Enzyme price <sup>3</sup>                | \$/kg-protein     | 5     | 4     |
| Hydrolysis temperature                   | C                 | 50    | 50    |
| <b>Bioconversion<sup>3,4</sup></b>       |                   |       |       |
| Corn steep liquor (CSL) cost             | \$/kg             | 0.07  | 0.05  |
| Diammonium phosphate (DAP) cost          | \$/kg             | 0.36  | 0.30  |
| CSL loading                              | wt%               | 0.25  | 0.20  |
| DAP loading                              | g/L               | 0.33  | 0.30  |
| <b>Ethanol <sup>4</sup></b>              |                   |       |       |
| Bioconversion reactor power              | kW/m <sup>3</sup> | 0.05  | 0.05  |
| Bioconversion time                       | h                 | 36.00 | 36.00 |
| Glucose to ethanol                       | %                 | 95.00 | 98.00 |
| Xylose to ethanol                        | %                 | 85.00 | 90.00 |



| <b>Bisabolene<sup>3</sup></b>                 |                   |        |        |
|-----------------------------------------------|-------------------|--------|--------|
| Bioconversion reactor power                   | kW/m <sup>3</sup> | 1.50   | 0.56   |
| Aeration rate                                 | vvm               | 1.00   | 0.20   |
| Bioconversion time                            | h                 | 72.00  | 48.00  |
| Glucose to bisabolene                         | %                 | 5.90   | 90.00  |
| Xylose to bisabolene                          | %                 | 5.90   | 90.00  |
| <b>Recovery and separation<sup>3,4</sup></b>  |                   |        |        |
| Biofuel recovery                              | %                 | 95     | 98     |
| Solvent recovery                              | %                 | 95     | 99     |
| <b>Hydrogenation<sup>3</sup></b>              |                   |        |        |
| Hydrogen mixing rate                          | mol%              | 2.96   | 2.96   |
| Hydrogen cost                                 | \$/kg             | 1.61   | 1.25   |
| Hydrogenation catalyst loading                | wt%               | 0.75   | 0.75   |
| Hydrogenation catalyst cost                   | \$/kg             | 261.33 | 231.78 |
| Hydrogen recovery                             | %                 | 85     | 95     |
| <b>Wastewater treatment<sup>4</sup></b>       |                   |        |        |
| Organic matter to biogas                      | wt%               | 86     | 91     |
| <b>Onsite Energy Generation<sup>3,4</sup></b> |                   |        |        |

|                                |       |         |         |
|--------------------------------|-------|---------|---------|
| Boiler chemicals cost          | \$/kg | 5       | 4       |
| Natural gas cost               | \$/kg | 0.22    | 0.10    |
| <b>Utilities<sup>3,4</sup></b> |       |         |         |
| Water cost                     | \$/kg | 0.00022 | 0.00022 |
| CIP (1% NaOH) price            | \$/kg | 0.53    | 0.65    |

Table S12. Annual operating cost

| Section                       | Ethanol (2020\$)                |                     | Bisabolane (2020\$)             |                     |
|-------------------------------|---------------------------------|---------------------|---------------------------------|---------------------|
|                               | Current state-of-the-technology | Optimal future case | Current state-of-the-technology | Optimal future case |
| Feedstock supply and handling | 83385798.2                      | 70720315.1          | 83385798.2                      | 70720315.1          |
| Biomass pretreatment          | 23784686.5                      | 17895901.7          | 23784686.5                      | 17895901.7          |
| Enzymatic hydrolysis          | 34564877.1                      | 28598063.3          | 34564877.1                      | 28598063.3          |
| Bioconversion                 | 10151503.6                      | 7415301.2           | 37942173.4                      | 13732193.1          |
| Recovery and separation       | 13414949.0                      | 11288197.8          | 29935039.4                      | 22551361.5          |
| Catalytic upgrading           | 0.0                             | 0.0                 | 1653606.5                       | 13941691.9          |
| Wastewater treatment          | 6887075.0                       | 5963680.5           | 7035962.0                       | 6229351.5           |
| Onsite energy generation      | 7046371.0                       | 7096962.1           | 28607397.8                      | 7593132.6           |

|                                    |                    |                    |                    |                    |
|------------------------------------|--------------------|--------------------|--------------------|--------------------|
| Utilities                          | 10682914.8         | 9075650.7          | 4042183.3          | 4552053.2          |
| <b>Total annual operating cost</b> | <b>189918175.2</b> | <b>158054072.4</b> | <b>250951724.1</b> | <b>185814064.0</b> |

## **Bibliography**

- 1 N. R. Baral, J. Dahlberg, D. Putnam, J. C. Mortimer and C. D. Scown, *ACS Sustain. Chem. Eng.*, , DOI:10.1021/acssuschemeng.0c03784.
- 2 S. Gautam, U. Mishra, C. D. Scown and Y. Zhang, *Glob. Change Biol. Bioenergy*, , DOI:10.1111/gcbb.12736.
- 3 N. R. Baral, O. Kavvada, D. Mendez-Perez, A. Mukhopadhyay, T. S. Lee, B. A. Simmons and C. D. Scown, *Energy Environ. Sci.*, 2019, **12**, 807–824.
- 4 D. Humbird, R. Davis, L. Tao, C. Kinchin, D. Hsu, A. Aden, P. Schoen, J. Lukas, B. Olthof, M. Worley, D. Sexton and D. Dudgeon, *Process Design and Economics for Biochemical Conversion of Lignocellulosic Biomass to Ethanol: Dilute-Acid Pretreatment and Enzymatic Hydrolysis of Corn Stover*, National Renewable Energy Laboratory (NREL), Golden, CO (United States), 2011.
